# Supplementary material
Source: ML conference proceedings conference paper supplement (https://proceedings.neurips.cc/paper_files/paper/2022/hash/7e0af0d1bc0ec2a90fc294be2e00447e-Abstract.html)
Supplement: Supplementary file 1 [file 7e0af0d1bc0ec2a90fc294be2e00447e-Supplemental-Conference.zip]

Archive with 4 entries (4 files):
- appendix.pdf
- __MACOSX/._appendix.pdf
- main.pdf
- __MACOSX/._main.pdf
